# Supplementary material for: ENCAPP: elastic-net-based prognosis prediction and biomarker discovery for human cancers
Source: PubMed Central journal article supplement (PMC4392808; doi:10.1186/s12864-015-1465-9), 2015-04-03

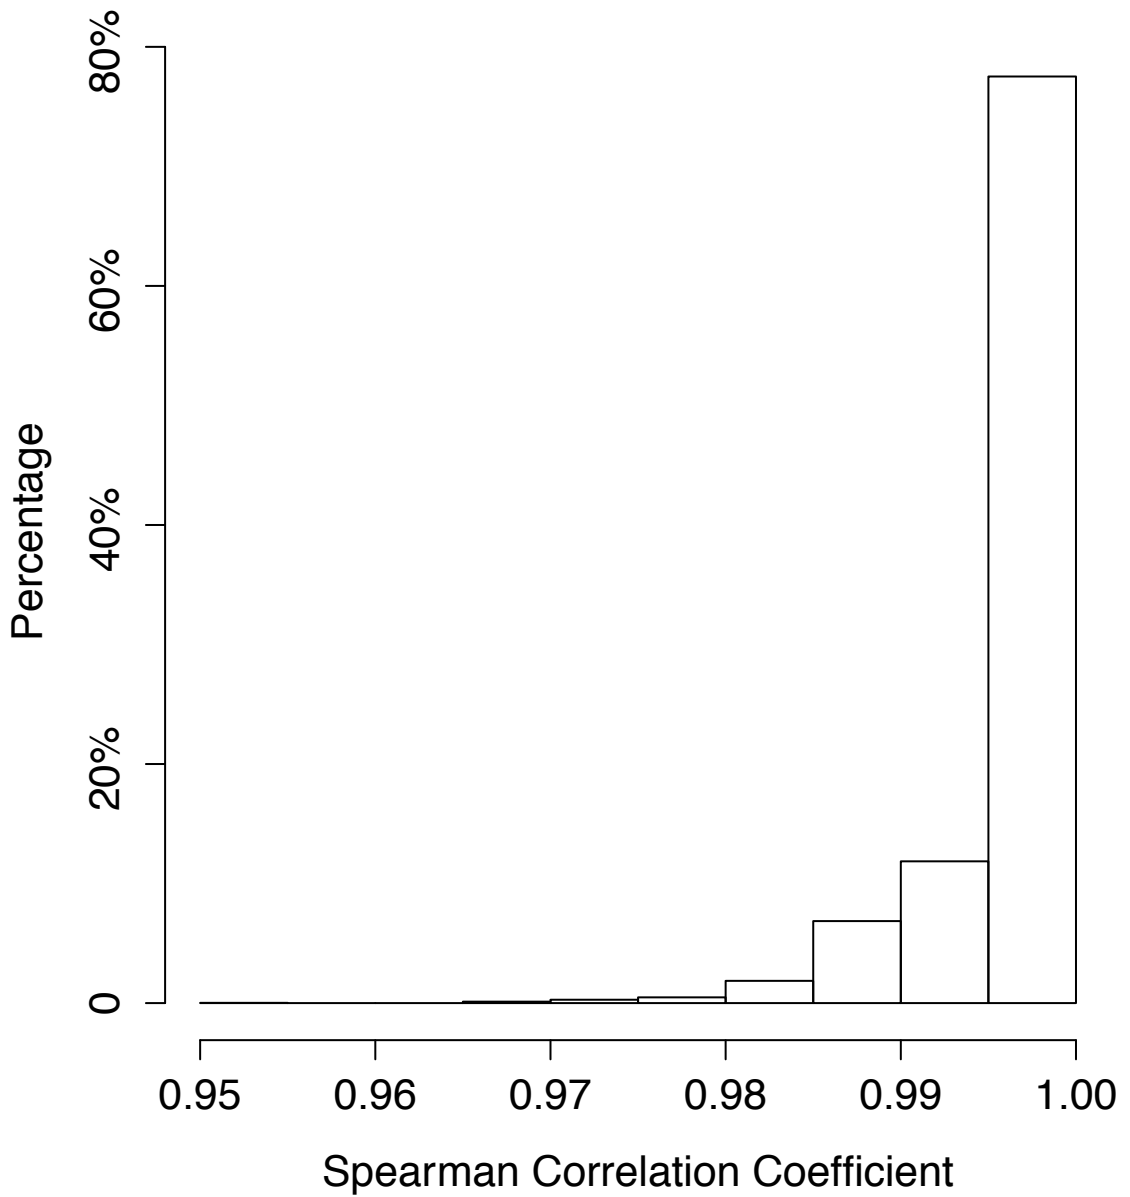

Supplement: 12864_2015_1465_MOESM4_ESM.pdf [file 12864_2015_1465_MOESM4_ESM.pdf]
